# Supplementary material for: Time Trends and Variation in the Use of Active Surveillance for Management of Low-risk Prostate Cancer in the US
Source: PubMed Central journal article supplement (PMC9982696; doi:10.1001/jamanetworkopen.2023.1439), 2023-03-02

## Supplementary Online Content

Cooperberg MR, Meeks W, Fang R, Gaylis FD, Catalona WJ, Makarov DV. Time trends and variation in the use of active surveillance for management of low-risk prostate cancer in the US. *JAMA Netw Open*. 2023;6(3):e231439. doi:10.1001/jamanetworkopen.2023.1439

**eFigure 1.** Locations of AQUA Practices

**eFigure 2.** CONSORT-Style Patient Inclusion Diagram

**eFigure 3.** Treatment of Low-risk Prostate Cancer Over Time Among Black (Top Panel) and White (Bottom Panel) Patients

This supplementary material has been provided by the authors to give readers additional information about their work.

**eFigure 1.** Locations of AQUA Practices  
Circle sizes represent numbers of urology providers per practice.

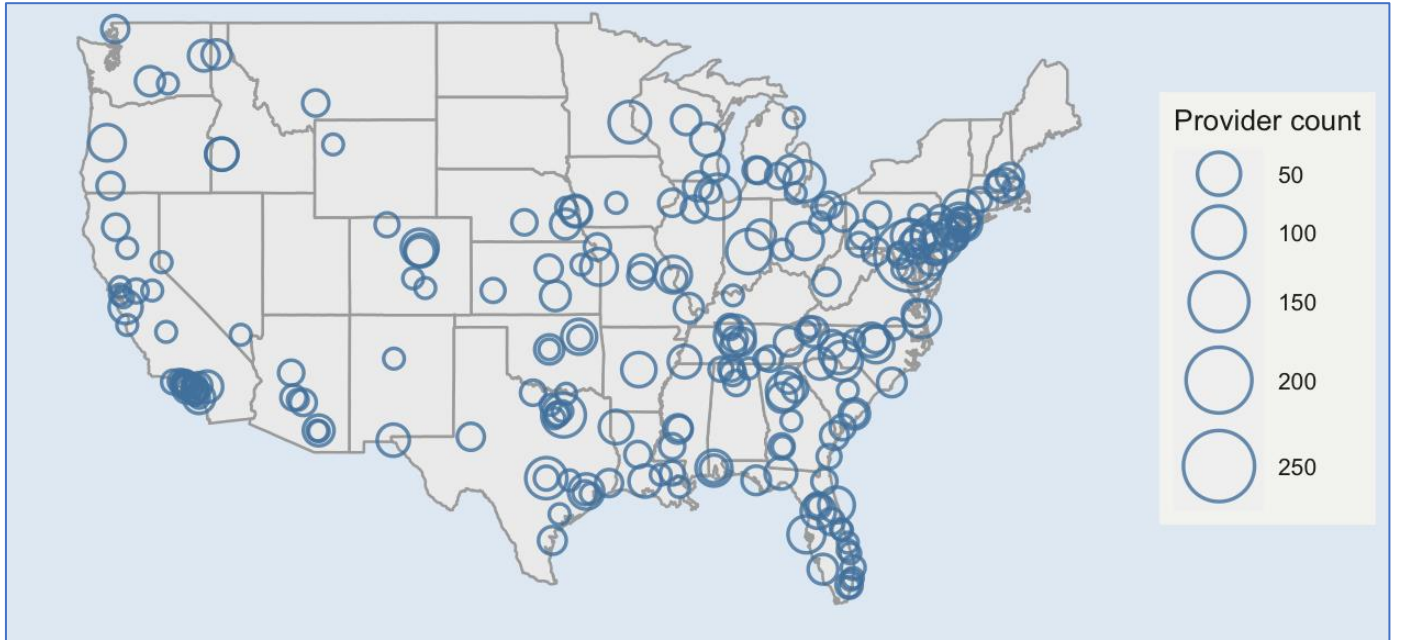

**eFigure 2.** CONSORT-Style Patient Inclusion Diagram

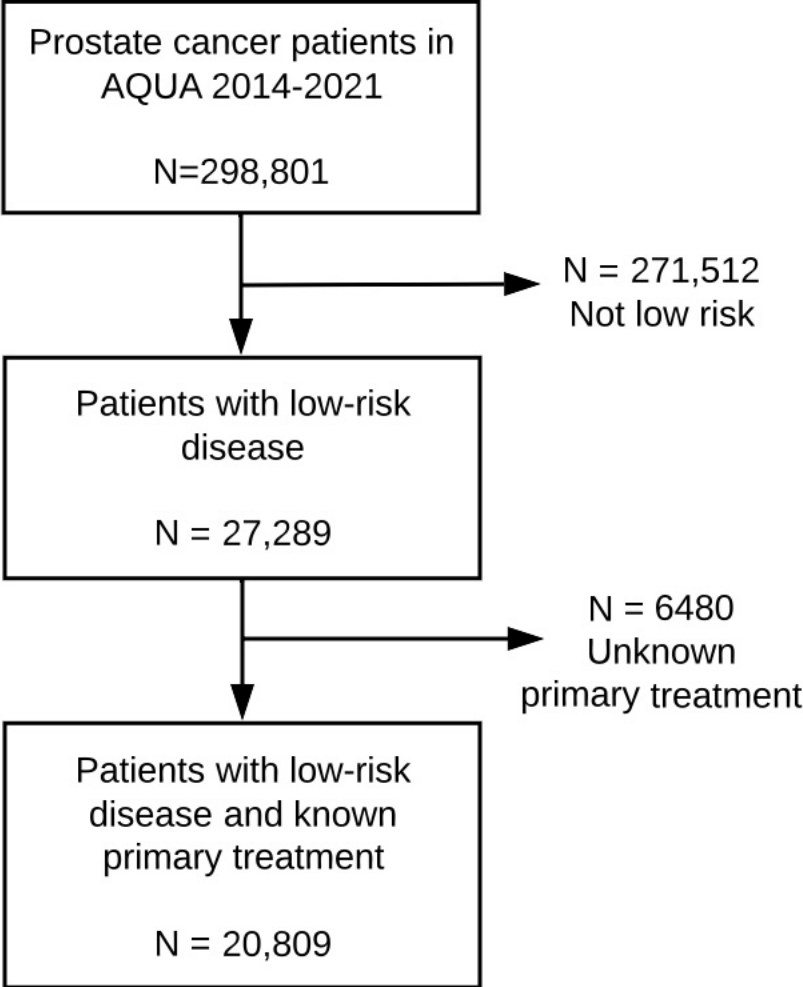

**eFigure 3.** Treatment of Low-risk Prostate Cancer Over Time Among Black (Top Panel) and White (Bottom Panel) Patients

ADT = androgen deprivation monotherapy, EBRT = external-beam radiation therapy

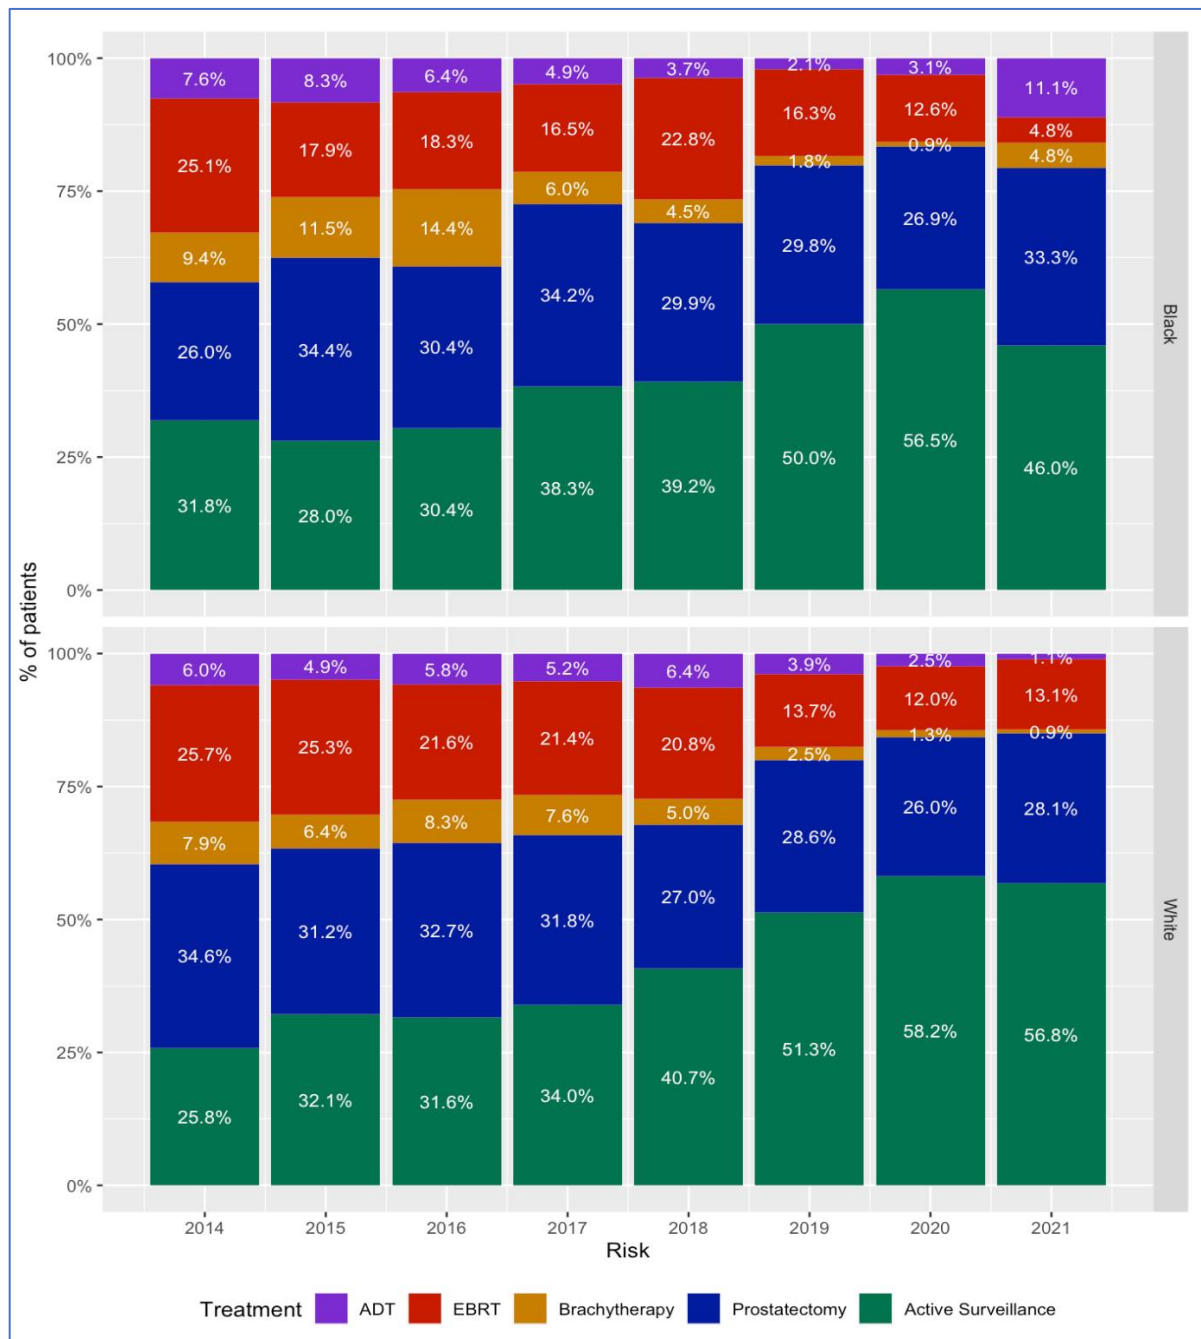

Supplement: jamanetwopen-e231439-s001.pdf [file jamanetwopen-e231439-s001.pdf]
