# Supplementary material for: Time Trends and Variation in the Use of Active Surveillance for Management of Low-risk Prostate Cancer in the US
Source: PubMed Central journal article supplement (PMC9982696; doi:10.1001/jamanetworkopen.2023.1439), 2023-03-02
Supplement: jamanetwopen-e231439-s002.pdf [file jamanetwopen-e231439-s002.pdf]

## Data Sharing Statement

Cooperberg. Time Trends and Variation in the Use of Active Surveillance for Management of Low-risk Prostate Cancer in the US. *JAMA Netw Open*. Published March 02, 2023.

doi:10.1001/jamanetworkopen.2023.1439

### Data

**Data available:** No

### Additional Information

**Explanation for why data not available:** Participation agreements between urology practices in AQUA and the AUA preclude sharing of patient-level data with 3rd parties without express permission by the practices.
